# Supplementary material for: Intestinal Biofilms and Laxatives: Efficacy of Oral Sulfate Solution in Combination with Linaclotide for Pre-colonoscopy Bowel Preparation
Source: Research Square preprint supplement (doi:10.21203/rs.3.rs-6270147/v1), 2025-06-02
Supplement: Supplementary file 1 [file 101b33c60dc2961191924636.docx]

**Supplementary table 1：**3 Group Bowel Bubble Score

|  | OSS+Linaclotide  Group（n=143） | OSS Group  （n=132） | PEG Group  （n=125） | P value | P（A） | P（B） | P（C） |
| --- | --- | --- | --- | --- | --- | --- | --- |
| Bowel Bubble Score |  |  |  |  |  |  |  |
| Left colon |  |  |  | 0.530 | 0.659 | 0.283 | 0.526 |
| Ⅰ | 120（83.9） | 117（88.6） | 103（82.4） |  |  |  |  |
| Ⅱ | 20（14.0） | 13（9.8） | 17（13.6） |  |  |  |  |
| Ⅲ | 3（2.1） | 2（1.5） | 5（4.0） |  |  |  |  |
| Ⅳ | 0（0） | 0（0） | 0（0） |  |  |  |  |
| Transverse colon |  |  |  | 0.159 | 0.440 | 0.050 | 0.356 |
| Ⅰ | 120（83.9） | 118（89.4） | 100（80.0） |  |  |  |  |
| Ⅱ | 20（14.0） | 13（9.8） | 19（15.2） |  |  |  |  |
| Ⅲ | 3（2.1） | 1（0.8） | 6（4.8） |  |  |  |  |
| Ⅳ | 0（0） | 0（0） | 0（0） |  |  |  |  |
| Right colon |  |  |  | 0.069 | 0.257 | 0.050 | 0.205 |
| Ⅰ | 117（81.8） | 118（89.4） | 100（80.0） |  |  |  |  |
| Ⅱ | 24（16.8） | 13（9.8） | 19（15.2） |  |  |  |  |
| Ⅲ | 2（1.4） | 1（0.8） | 6（4.8） |  |  |  |  |
| Ⅳ | 0（0） | 0（0） | 0（0） |  |  |  |  |

Data are presented as n (%). OSS: Oral sulfate solution, PEG: Polyethylene glycol.P(A):OSS+Linaclotide Group vs PEG Group;P(B):OSS Group vs PEG Group;P(C):OSS+Linaclotide Group vs OSS Group.

**Supplementary tabe 2:**Intestinal biofilm and bowel preparation

| Variable | BF（+）  （n=120） | BF（-）  （n=280） | P value |
| --- | --- | --- | --- |
| Age (years) | 43.5（34.0-60.0） | 44.0（35.0-60.0） | 0.582 |
| Sex |  |  | 0.062 |
| Female | 76（63.3） | 149（53.2） |  |
| Male | 44（36.7） | 131（46.8） |  |
| BMI（kg/m2） | 23.95±3.44 | 23.76±2.99 | 0.592 |
| Drinking | 32（26.7） | 80（28.6） | 0.697 |
| Smoking | 30（25.2） | 74（26.4） | 0.800 |
| Medical history |  |  |  |
| Hypertension | 22（18.3） | 41（14.6） | 0.353 |
| Diabetes | 7（5.8） | 8（2.9） | 0.251 |
| Constipation | 0（0.0） | 3（1.1） | 0.557 |
| History of abdominal surgery | 23（19.2） | 50（17.9） | 0.756 |
| Group | 120（30.0） | 280（70.0） | 0.006 |
| OSS+Linaclotide | 33（27.5） | 110（39.3） |  |
| OSS | 53（44.2） | 79（28.2） |  |
| PEG | 34（28.3） | 91（32.5） |  |
| Bowel preparation |  |  | 0.002 |
| Adequate | 88（73.3） | 241（86.1） |  |
| Inadequate | 32（26.7） | 39（13.9） |  |
| **Continued Table 5** |  |  |  |
| BBPS score | 6.0（5.0-7.75） | 7.0（6.0-8.0） | 0.001 |
| OSS+Linaclotide | 6.0（4.5-7.0） | 7.0（6.0-8.0） | ＜0.001 |
| OSS | 7.0（6.0-8.0） | 7.0（6.0-8.0） | 0.123 |
| PEG | 6.0（5.0-7.0） | 6.0（5.0-7.0） | 0.182 |
| Polyp detection rate | 55（45.8） | 114（40.7） | 0.342 |
| Adenoma detection rate | 107（89.2） | 254（90.7） | 0.633 |
| Cancer detection rate | 3（2.5） | 1（0.4） | 0.154 |
| Adverse reactions | 56（46.7） | 127（69.4） | 0.810 |
| Nausea | 36（30.0） | 88（31.4） | 0.777 |
| Vomit | 11（9.2） | 36（12.9） | 0.294 |
| Bloating | 21（17.5） | 28（10.0） | 0.036 |
| Abdominal pain | 8（6.7） | 14（5.0） | 0.503 |

Data are presented as n (%) or mean ± SD or median [interquartile range]. BF(+), biofilm positive group; BF(-), biofilm negative group; OSS, oral sulfate solution; PEG, polyethylene glycol; BBPS, Boston Bowel Preparation Scale.
